# Supplementary material for: Lactate/pyruvate transporter MCT-1 is a direct Wnt target that confers sensitivity to 3-bromopyruvate in colon cancer
Source: PubMed Central journal article supplement (PMC5046889; doi:10.1186/s40170-016-0159-3), 2016-10-03

Figure S1

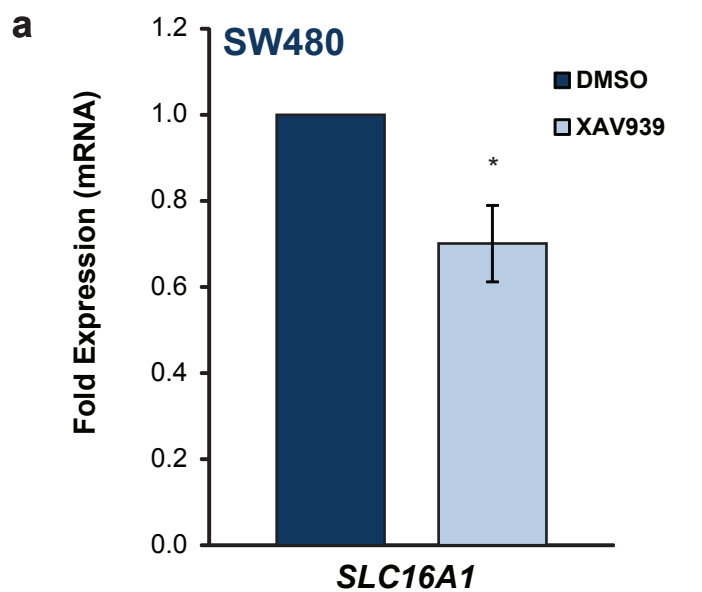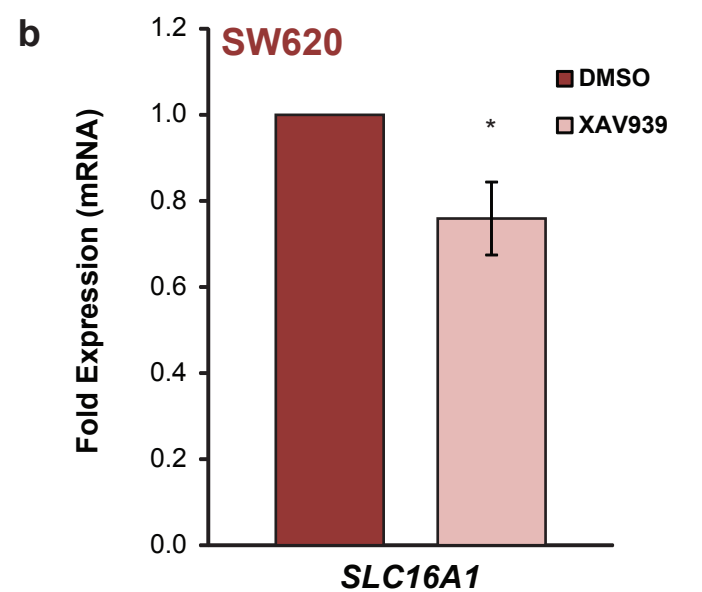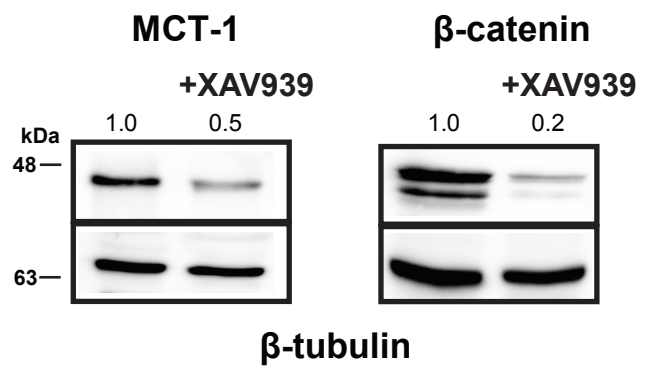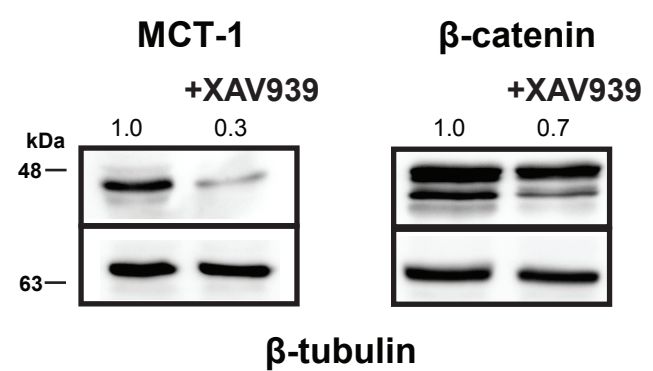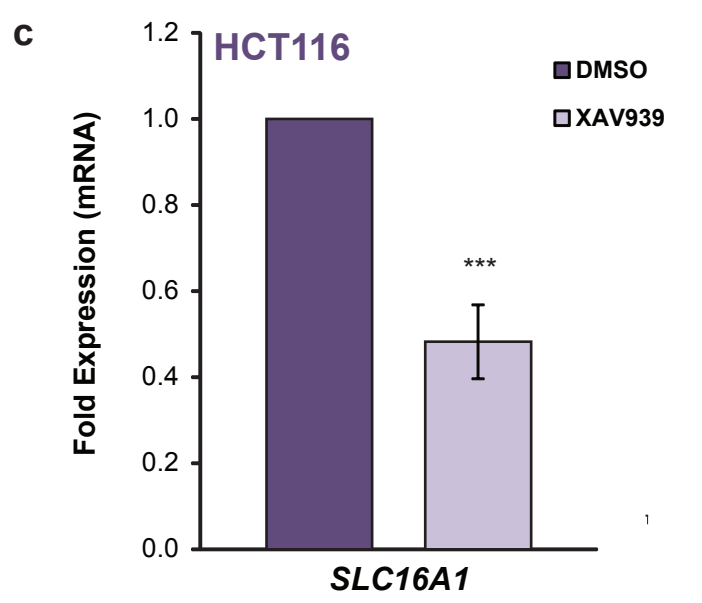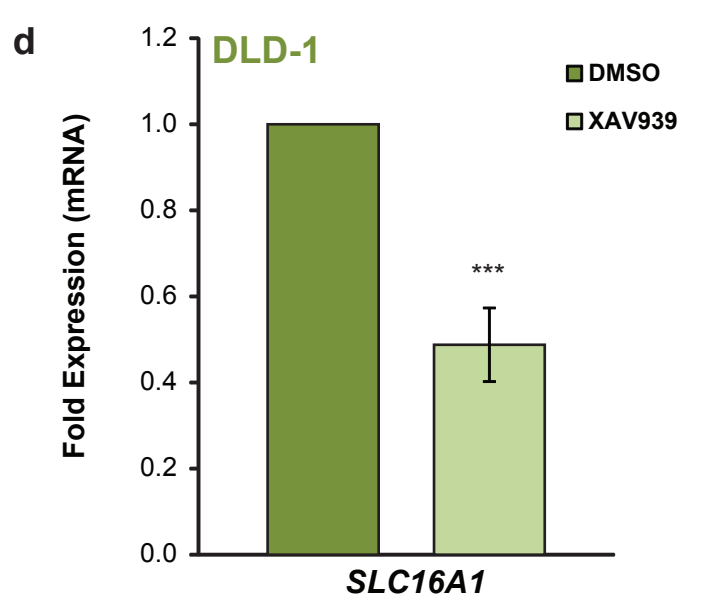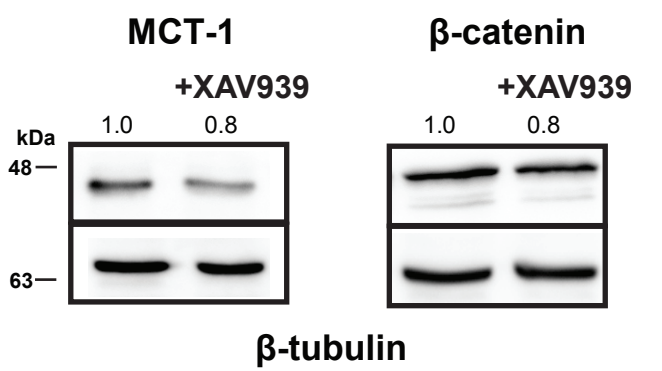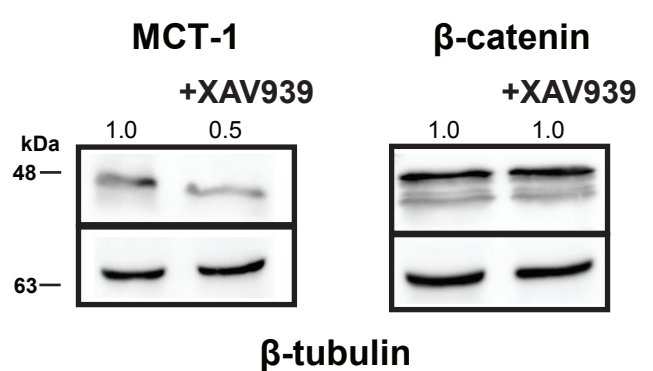

Supplement: 40170_2016_159_MOESM1_ESM.pdf [file 40170_2016_159_MOESM1_ESM.pdf]
